# Supplementary material
Source: PubMed Central journal article supplement (PMC4725519)
Supplement: pnas.1516725113.sd01.pdf [file pnas.1516725113.sd01.pdf]

### Dataset S1. Characterization of SOD1 trimer interfaces.

Stars indicate residues at which a disease-associated mutation exists. A residue is involved in the monomer-monomer interface if any atom (not including hydrogens) is within 4.5 Å of any atom (not including hydrogens) of a residue from another monomer. We calculated interface interaction energies with and without van der Waals repulsion energy using the Medusa force field (Ding, F., Dokholyan, N. V. *PLoS Comput. Biol.* 2:e85). Residue numbers listed are interacting on either one or both monomers in the given monomer-monomer interface.

#### MODEL 1

|           | Monomer 2                                                                                                                                                                                                                                                                                                                                                                                                                                                                                                                                                                                                                                       | Monomer 3                                                                                                                                                                                                                                                                                                                                                                                                                                                                                                                                             |
|-----------|-------------------------------------------------------------------------------------------------------------------------------------------------------------------------------------------------------------------------------------------------------------------------------------------------------------------------------------------------------------------------------------------------------------------------------------------------------------------------------------------------------------------------------------------------------------------------------------------------------------------------------------------------|-------------------------------------------------------------------------------------------------------------------------------------------------------------------------------------------------------------------------------------------------------------------------------------------------------------------------------------------------------------------------------------------------------------------------------------------------------------------------------------------------------------------------------------------------------|
| Monomer 1 | <p><b>Residues involved:</b><br/>           23 24 25 27 28 29 30 31 33 34 37* 38* 41*<br/>           42 44 45* 46* 47 48* 49 51 52 53 56 57 58<br/>           61 62 64 65* 66 67 68 69 73 74 75 76* 77<br/>           78 79 95* 99 101* 102 103 104* 105* 106*<br/>           108 109 110 111* 112* 114* 115* 116 117<br/>           118* 119 121 125* 130 131 132 133* 134*<br/>           135 148* 150 152</p> <p><b>Interface interaction energy:</b><br/>           -175 kcal/mol</p> <p><b>Interface interaction energy, no van der Waals repulsion:</b><br/>           -184 kcal/mol</p> <p><b>Interface area:</b> 2285 Å<sup>2</sup></p> | <p><b>Residues involved:</b><br/>           2 52 53 63 65* 66 67 68 120 135 136 138<br/>           141* 147*</p> <p><b>Interface interaction energy:</b><br/>           -37 kcal/mol</p> <p><b>Interface interaction energy, no van der Waals repulsion:</b><br/>           -38 kcal/mol</p> <p><b>Interface area:</b> 743 Å<sup>2</sup></p>                                                                                                                                                                                                          |
| Monomer 2 | X                                                                                                                                                                                                                                                                                                                                                                                                                                                                                                                                                                                                                                               | <p><b>Residues involved:</b><br/>           1 2 4* 5 6* 7* 8* 10* 12* 13 16* 17 18 19*<br/>           20* 21* 22* 23 24 25 28 31 33 34 35 42 44<br/>           47 48* 56 62 65* 66 67 68 69 70 73 77 78<br/>           93* 95* 96 98 108 109 111* 114* 116 117<br/>           118* 119 120 121 124* 127* 145* 148*</p> <p><b>Interface interaction energy:</b><br/>           -145 kcal/mol</p> <p><b>Interface interaction energy, no van der Waals repulsion:</b><br/>           -150 kcal/mol</p> <p><b>Interface area:</b> 2182 Å<sup>2</sup></p> |

## MODEL 2

|           | Monomer 2                                                                                                                                                                                                                                                               | Monomer 3                                                                                                                                                                                                                                                                                                                                                                                                                                                                                                                                          |
|-----------|-------------------------------------------------------------------------------------------------------------------------------------------------------------------------------------------------------------------------------------------------------------------------|----------------------------------------------------------------------------------------------------------------------------------------------------------------------------------------------------------------------------------------------------------------------------------------------------------------------------------------------------------------------------------------------------------------------------------------------------------------------------------------------------------------------------------------------------|
| Monomer 1 | <p><b><u>Residues involved:</u></b><br/>150</p> <p><b><u>Interface interaction energy:</u></b><br/>-3 kcal/mol</p> <p><b><u>Interface interaction energy, no van der Waals repulsion:</u></b><br/>-3 kcal/mol</p> <p><b><u>Interface area:</u></b> 56 Å<sup>2</sup></p> | <p><b><u>Residues involved:</u></b><br/>1 2 6 7* 8* 21* 22* 23 25 27 28 48* 49 51<br/>52 57 58 61 62 63 64 125* 135 136 141*<br/>142 143 145* 147* 150 152</p> <p><b><u>Interface interaction energy:</u></b><br/>-83 kcal/mol</p> <p><b><u>Interface interaction energy, no van der Waals repulsion:</u></b><br/>-84 kcal/mol</p> <p><b><u>Interface area:</u></b> 1472 Å<sup>2</sup></p>                                                                                                                                                         |
| Monomer 2 | X                                                                                                                                                                                                                                                                       | <p><b><u>Residues involved:</u></b><br/>1 2 4* 5 6 7* 10* 12* 13 14 16* 17 18 19*<br/>20 21* 22* 27 28 29 30 31 33 34 37* 48* 49<br/>52 53 56 57 58 63 64 65* 66 67 68 76* 80<br/>93* 95* 96 97 108 109 110 112* 114* 115*<br/>116 117 118* 130 131 132 133 134* 135<br/>136 141* 142 143 145* 147* 148* 150 152</p> <p><b><u>Interface interaction energy:</u></b><br/>-150 kcal/mol</p> <p><b><u>Interface interaction energy, no van der Waals repulsion:</u></b><br/>-156 kcal/mol</p> <p><b><u>Interface area:</u></b> 2321 Å<sup>2</sup></p> |

## MODEL 3

|           | Monomer 2                                                                                                                                                                                                                                        | Monomer 3                                                                                                                                                                                                                                                                                                                                                                                                                                           |
|-----------|--------------------------------------------------------------------------------------------------------------------------------------------------------------------------------------------------------------------------------------------------|-----------------------------------------------------------------------------------------------------------------------------------------------------------------------------------------------------------------------------------------------------------------------------------------------------------------------------------------------------------------------------------------------------------------------------------------------------|
| Monomer 1 | <p><b>Residues involved:</b><br/>53 66 67</p> <p><b>Interface interaction energy:</b><br/>-2 kcal/mol</p> <p><b>Interface interaction energy, no van der Waals repulsion:</b><br/>-2 kcal/mol</p> <p><b>Interface area:</b> 81 Å<sup>2</sup></p> | <p><b>Residues involved:</b><br/>1 2 4* 5 6 7* 10* 12* 13 14 16* 17 18 19*<br/>20 21* 22* 23 25 28 29 30 31 37* 42 47 48*<br/>49 51 52 53 56 57 98 99 105* 112* 113<br/>114* 115* 116 118* 120 141* 142 143 145*<br/>147* 148* 150 152</p> <p><b>Interface interaction energy:</b><br/>-153 kcal/mol</p> <p><b>Interface interaction energy, no van der Waals repulsion:</b><br/>-161 kcal/mol</p> <p><b>Interface area:</b> 2008 Å<sup>2</sup></p> |
| Monomer 2 | X                                                                                                                                                                                                                                                | <p><b>Residues involved:</b><br/>17 19* 22* 45 48* 49 52 53 56 57 58 61 62<br/>63 64 65* 66 67 68 69 70 76* 77 78 82 106*<br/>123 124* 127* 131 132 133 134* 135 136<br/>138 142 145*</p> <p><b>Interface interaction energy:</b><br/>-69 kcal/mol</p> <p><b>Interface interaction energy, no van der Waals repulsion:</b><br/>-70 kcal/mol</p> <p><b>Interface area:</b> 1381 Å<sup>2</sup></p>                                                    |

## MODEL 4

|           | Monomer 2                                                                                                                                                                                                                                                             | Monomer 3                                                                                                                                                                                                                                                                                                                                                                                                                                                                                                                                                                                                                 |
|-----------|-----------------------------------------------------------------------------------------------------------------------------------------------------------------------------------------------------------------------------------------------------------------------|---------------------------------------------------------------------------------------------------------------------------------------------------------------------------------------------------------------------------------------------------------------------------------------------------------------------------------------------------------------------------------------------------------------------------------------------------------------------------------------------------------------------------------------------------------------------------------------------------------------------------|
| Monomer 1 | <p><b>Residues involved:</b><br/>49 51 52 53 56 57 67 69 70</p> <p><b>Interface interaction energy:</b><br/>-10 kcal/mol</p> <p><b>Interface interaction energy, no van der Waals repulsion:</b><br/>-11 kcal/mol</p> <p><b>Interface area:</b> 336 Å<sup>2</sup></p> | <p><b>Residues involved:</b><br/>39 44 46* 47 48* 49 51 52 53 56 57 61 62<br/>63 64 66 68 127* 135</p> <p><b>Interface interaction energy:</b><br/>-52 kcal/mol</p> <p><b>Interface interaction energy, no van der Waals repulsion:</b><br/>-54 kcal/mol</p> <p><b>Interface area:</b> 729 Å<sup>2</sup></p>                                                                                                                                                                                                                                                                                                              |
| Monomer 2 | <p>X</p>                                                                                                                                                                                                                                                              | <p><b>Residues involved:</b><br/>1 2 4* 5 6 7* 8* 10* 12* 13 14 16* 17 18<br/>19* 20 21* 22* 23 24 25 27 28 31 35 37*<br/>41* 44 45 46* 48* 49 56 58 63 65* 66 67 70<br/>73 74 75 78 79 80 82 83 86 87 89 90 91 93*<br/>95* 96 97 98 99 100 101* 102 103 104*<br/>105* 106* 108 109 110 111 112* 114* 115*<br/>116 117 118* 119 120 121 123 125* 127*<br/>131 132 135 136 142 143 145* 147* 148*<br/>150 152</p> <p><b>Interface interaction energy:</b><br/>-377 kcal/mol</p> <p><b>Interface interaction energy, no van der Waals repulsion:</b><br/>-393 kcal/mol</p> <p><b>Interface area:</b> 4942 Å<sup>2</sup></p> |

## MODEL 5

|           | Monomer 2                                                                                                                                                                                                                                                                                                                                                                                    | Monomer 3                                                                                                                                                                                                                                                                                                                                                                                                                                                                                                                                                                                                           |
|-----------|----------------------------------------------------------------------------------------------------------------------------------------------------------------------------------------------------------------------------------------------------------------------------------------------------------------------------------------------------------------------------------------------|---------------------------------------------------------------------------------------------------------------------------------------------------------------------------------------------------------------------------------------------------------------------------------------------------------------------------------------------------------------------------------------------------------------------------------------------------------------------------------------------------------------------------------------------------------------------------------------------------------------------|
| Monomer 1 | <p><b>Residues involved:</b><br/>1 2 4* 8* 10* 12* 13 14 20 49 51 52 53 56<br/>61 95* 96 103 105* 108 109 110 111 112*<br/>114* 115* 138 142 143 145* 147* 148* 150<br/>152</p> <p><b>Interface interaction energy:</b><br/>-105 kcal/mol</p> <p><b>Interface interaction energy, no van der<br/>Waals repulsion:</b><br/>-110 kcal/mol</p> <p><b>Interface area:</b> 1634 Å<sup>2</sup></p> | <p><b>Residues involved:</b><br/>2 49 52 56 57 58 112* 138 141* 142 143<br/>147* 148*</p> <p><b>Interface interaction energy:</b><br/>-32 kcal/mol</p> <p><b>Interface interaction energy, no van der<br/>Waals repulsion:</b><br/>-33 kcal/mol</p> <p><b>Interface area:</b> 554 Å<sup>2</sup></p>                                                                                                                                                                                                                                                                                                                 |
| Monomer 2 | X                                                                                                                                                                                                                                                                                                                                                                                            | <p><b>Residues involved:</b><br/>1 2 4* 5 6 7* 8* 10* 12* 13 14 17 18 19* 20<br/>21* 22* 23 24 25 27 28 29 30 31 33 34 35<br/>37* 38* 39 41* 42 44 45 46* 47 48* 49 52<br/>53 56 57 63 64 65* 73 74 75 76* 77 78 79<br/>80 83 85 86 87 89 90 91 93* 95* 96 97 98<br/>99 100 101* 102 103 104* 105* 106* 108<br/>109 110 111 112* 114* 115* 116 117 118*<br/>119 120 121 141* 143 145* 147* 150 152</p> <p><b>Interface interaction energy:</b><br/>-258 kcal/mol</p> <p><b>Interface interaction energy, no van der<br/>Waals repulsion:</b><br/>-272 kcal/mol</p> <p><b>Interface area:</b> 3795 Å<sup>2</sup></p> |

MODEL 6

|           | Monomer 2                                                                                                                                                                                                                                                                                                                                                                                          | Monomer 3                                                                                                                                                                                                                                                                                                                                                                                                                                                                                                                                                                                                                                          |
|-----------|----------------------------------------------------------------------------------------------------------------------------------------------------------------------------------------------------------------------------------------------------------------------------------------------------------------------------------------------------------------------------------------------------|----------------------------------------------------------------------------------------------------------------------------------------------------------------------------------------------------------------------------------------------------------------------------------------------------------------------------------------------------------------------------------------------------------------------------------------------------------------------------------------------------------------------------------------------------------------------------------------------------------------------------------------------------|
| Monomer 1 | <p><b>Residues involved:</b><br/>7* 12* 13 14 16* 17 18 20 21* 25 27 28 29<br/>30 31 33 34 39 41* 42 44 45 46* 47 48* 49<br/>51 57 58 61 62 65* 74 75 76* 77 78 79 80<br/>83 85 86</p> <p><b>Interface interaction energy:</b><br/>-95 kcal/mol</p> <p><b>Interface interaction energy, no van der<br/>Waals repulsion:</b><br/>-102 kcal/mol</p> <p><b>Interface area:</b> 1612 Å<sup>2</sup></p> | <p><b>Residues involved:</b><br/>1 2 4* 5 6 7* 8* 12* 13 14 17 18 19* 20 21*<br/>22* 23 24 25 27 28 29 30 31 34 44</p> <p><b>Interface interaction energy:</b><br/>-61 kcal/mol</p> <p><b>Interface interaction energy, no van der<br/>Waals repulsion:</b><br/>-65 kcal/mol</p> <p><b>Interface area:</b> 913 Å<sup>2</sup></p>                                                                                                                                                                                                                                                                                                                   |
| Monomer 2 | X                                                                                                                                                                                                                                                                                                                                                                                                  | <p><b>Residues involved:</b><br/>1 2 4* 5 6 7* 8* 12* 13 14 16* 17 18 19* 20<br/>21* 22* 24 27 28 29 30 31 33 34 35 37* 38*<br/>39 41* 42 44 45 46* 47 49 51 61 62 63 64<br/>66 67 68 69 70 77 80 82 83 85 86 87 89 90<br/>91 93* 95* 96 97 98 99 100 101* 102 103<br/>104* 105* 106* 108 109 110 112* 114*<br/>115* 116 117 118* 119 120 124* 125* 127*<br/>130 131 132 133 134* 135 136 141* 142<br/>143 145* 147* 148* 150 152</p> <p><b>Interface interaction energy:</b><br/>-316 kcal/mol</p> <p><b>Interface interaction energy, no van der<br/>Waals repulsion:</b><br/>-333 kcal/mol</p> <p><b>Interface area:</b> 4419 Å<sup>2</sup></p> |

## MODEL 7

|           | Monomer 2                                                                                                                                                                                                                                                                                                              | Monomer 3                                                                                                                                                                                                                                                                                                                                                                                                                                                                                                                                                                                        |
|-----------|------------------------------------------------------------------------------------------------------------------------------------------------------------------------------------------------------------------------------------------------------------------------------------------------------------------------|--------------------------------------------------------------------------------------------------------------------------------------------------------------------------------------------------------------------------------------------------------------------------------------------------------------------------------------------------------------------------------------------------------------------------------------------------------------------------------------------------------------------------------------------------------------------------------------------------|
| Monomer 1 | <p><b>Residues involved:</b><br/>42 44 46* 47 49 51 52 53 57 61 62 63 64 70<br/>78 83 85 87 123 127* 133 135</p> <p><b>Interface interaction energy:</b><br/>-46 kcal/mol</p> <p><b>Interface interaction energy, no van der Waals repulsion:</b><br/>-47 kcal/mol</p> <p><b>Interface area:</b> 811 Å<sup>2</sup></p> | <p><b>Residues involved:</b><br/>2 4* 6 8* 10* 12* 13 14 16* 18 33 35 46*<br/>47 48* 49 51 52 83 89 93* 95* 99 103 105*<br/>108 109 110 111 112* 114* 135 147* 150<br/>152</p> <p><b>Interface interaction energy:</b><br/>-71 kcal/mol</p> <p><b>Interface interaction energy, no van der Waals repulsion:</b><br/>-76 kcal/mol</p> <p><b>Interface area:</b> 1433 Å<sup>2</sup></p>                                                                                                                                                                                                            |
| Monomer 2 | X                                                                                                                                                                                                                                                                                                                      | <p><b>Residues involved:</b><br/>1 2 8* 12* 13 14 16* 17 18 19* 20 21* 22*<br/>23 24 25 27 28 29 30 31 33 34 35 37* 38*<br/>39 41* 42 44 45 46* 47 48* 51 52 53 61 62<br/>67 68 77 78 79 80 82 83 85 86 87 89 90 91<br/>93* 95* 96 97 98 104* 108 109 110 111<br/>112* 114* 116 117 118* 119 120 121 123<br/>124* 125* 127* 130 131 132 133 141* 142<br/>143 145* 147* 148* 150 152</p> <p><b>Interface interaction energy:</b><br/>-254 kcal/mol</p> <p><b>Interface interaction energy, no van der Waals repulsion:</b><br/>-264 kcal/mol</p> <p><b>Interface area:</b> 3710 Å<sup>2</sup></p> |

MODEL 8

|           | Monomer 2                                                                                                                                                                                                                                                                                                                                                                                                                                                                                         | Monomer 3                                                                                                                                                                                                                                                                                                                                                                                                                                                                                                                                                                                                                                                                                                                           |
|-----------|---------------------------------------------------------------------------------------------------------------------------------------------------------------------------------------------------------------------------------------------------------------------------------------------------------------------------------------------------------------------------------------------------------------------------------------------------------------------------------------------------|-------------------------------------------------------------------------------------------------------------------------------------------------------------------------------------------------------------------------------------------------------------------------------------------------------------------------------------------------------------------------------------------------------------------------------------------------------------------------------------------------------------------------------------------------------------------------------------------------------------------------------------------------------------------------------------------------------------------------------------|
| Monomer 1 | <p><b>Residues involved:</b><br/>           4* 5 6 7* 8* 12* 13 14 17 31 37* 39 41* 42<br/>           44 45 46* 47 48* 49 51 52 53 56 57 58 61<br/>           62 63 64 65* 66 67 68 69 74 75 78 85 86 87<br/>           89 142 143 147* 150 152</p> <p><b>Interface interaction energy:</b><br/>           -108 kcal/mol</p> <p><b>Interface interaction energy, no van der<br/>           Waals repulsion:</b><br/>           -112 kcal/mol</p> <p><b>Interface area:</b> 1643 Å<sup>2</sup></p> | <p><b>Residues involved:</b><br/>           1 2 4* 5 6 7* 8* 12* 13 14 16* 17 19* 23 24<br/>           25 27 28 29 30 31 33 34 35 37* 38* 39 41*<br/>           42 44 45 46* 47 48* 49 51 62 63 64 65* 66<br/>           69 70 78 80 83 85 86 89 91 93* 95* 96 97<br/>           98 99 101* 103 105* 106* 108 110 111<br/>           112* 114* 115* 116 117 118* 119 120 121<br/>           123 124* 125* 127* 130 132 135 136 141*<br/>           142 143 145* 147* 148* 150 152</p> <p><b>Interface interaction energy:</b><br/>           -284 kcal/mol</p> <p><b>Interface interaction energy, no van der<br/>           Waals repulsion:</b><br/>           -300 kcal/mol</p> <p><b>Interface area:</b> 4107 Å<sup>2</sup></p> |
| Monomer 2 | X                                                                                                                                                                                                                                                                                                                                                                                                                                                                                                 | <p><b>Residues involved:</b><br/>           1 2 4* 5 7* 14 17 19* 41* 42 48* 49 56 57<br/>           64 66 67 99 100 101* 102 103 104* 105*<br/>           111 114* 115* 147* 148* 150 152</p> <p><b>Interface interaction energy:</b><br/>           -62 kcal/mol</p> <p><b>Interface interaction energy, no van der<br/>           Waals repulsion:</b><br/>           -65 kcal/mol</p> <p><b>Interface area:</b> 1068 Å<sup>2</sup></p>                                                                                                                                                                                                                                                                                          |



MODEL 9

|                  |                                                                                                                                                                                                                                                                                                                                                                                                |                                                                                                                                                                                                                                                                                                                                                                                                                                                                                                                                                                                                            |
|------------------|------------------------------------------------------------------------------------------------------------------------------------------------------------------------------------------------------------------------------------------------------------------------------------------------------------------------------------------------------------------------------------------------|------------------------------------------------------------------------------------------------------------------------------------------------------------------------------------------------------------------------------------------------------------------------------------------------------------------------------------------------------------------------------------------------------------------------------------------------------------------------------------------------------------------------------------------------------------------------------------------------------------|
| <p>Monomer 1</p> | <p>Monomer 2</p> <p><b>Residues involved:</b><br/>25 27 28 29 30 31 33 49 51 52 53 62 63 64<br/>65* 66 67 68 69 70 73 85 91 118* 119 120<br/>121 123 125* 127* 130 134* 135 143</p> <p><b>Interface interaction energy:</b><br/>-63 kcal/mol</p> <p><b>Interface interaction energy, no van der<br/>Waals repulsion:</b><br/>-67 kcal/mol</p> <p><b>Interface area:</b> 1186 Å<sup>2</sup></p> | <p>Monomer 3</p> <p><b>Residues involved:</b><br/>27 28 45 47 48* 49 52 53 103 104* 108 109<br/>110 111 112*</p> <p><b>Interface interaction energy:</b><br/>-31 kcal/mol</p> <p><b>Interface interaction energy, no van der<br/>Waals repulsion:</b><br/>-32 kcal/mol</p> <p><b>Interface area:</b> 557 Å<sup>2</sup></p>                                                                                                                                                                                                                                                                                 |
| <p>Monomer 2</p> | <p>X</p>                                                                                                                                                                                                                                                                                                                                                                                       | <p><b>Residues involved:</b><br/>1 2 4* 5 6 7* 8* 10* 12* 13 14 16* 17 18<br/>19* 20 21* 22* 23 24 25 27 28 29 31 33 34<br/>35 37* 38* 41* 42 44 45 46* 47 48* 49 51<br/>56 57 58 62 63 64 65* 66 67 68 69 70 73 74<br/>75 76* 77 78 79 80 82 83 85 86 95* 96 97<br/>98 99 101* 102 103 104* 105* 112* 114*<br/>115* 117 125* 130 131 132 133 138 141*<br/>142 143 145* 147* 148* 150 152</p> <p><b>Interface interaction energy:</b><br/>-355 kcal/mol</p> <p><b>Interface interaction energy, no van der<br/>Waals repulsion:</b><br/>-370 kcal/mol</p> <p><b>Interface area:</b> 4478 Å<sup>2</sup></p> |

## MODEL 10

|           | Monomer 2                                                                                                                                                                                                                                                                                                                                                                                                  | Monomer 3                                                                                                                                                                                                                                                                                                                                                                                                                                                                                                                                                           |
|-----------|------------------------------------------------------------------------------------------------------------------------------------------------------------------------------------------------------------------------------------------------------------------------------------------------------------------------------------------------------------------------------------------------------------|---------------------------------------------------------------------------------------------------------------------------------------------------------------------------------------------------------------------------------------------------------------------------------------------------------------------------------------------------------------------------------------------------------------------------------------------------------------------------------------------------------------------------------------------------------------------|
| Monomer 1 | <p><b>Residues involved:</b><br/>1 2 4* 5 8* 14 16* 18 19* 23 24 25 27 28 29<br/>31 35 41* 42 44 45 46* 47 48* 49 51 52 85<br/>86 87 89 90 95* 96 98 100 118* 119 120<br/>121 147* 148* 150</p> <p><b>Interface interaction energy:</b><br/>-77 kcal/mol</p> <p><b>Interface interaction energy, no van der<br/>Waals repulsion:</b><br/>-81 kcal/mol</p> <p><b>Interface area:</b> 1551 Å<sup>2</sup></p> | <p><b>Residues involved:</b><br/>1 2 4* 6 7* 8* 10* 12* 13 14 16* 17 18 19*<br/>20 21* 28 29 30 31 33 34 35 37* 38* 42 46*<br/>48* 49 52 53 56 78 80 83 85 89 103 108 109<br/>110 111 112* 114* 115* 117 118* 119 124*<br/>127* 131 133 134* 135 136 138 143 147*<br/>150 152</p> <p><b>Interface interaction energy:</b><br/>-170 kcal/mol</p> <p><b>Interface interaction energy, no van der<br/>Waals repulsion:</b><br/>-176 kcal/mol</p> <p><b>Interface area:</b> 2843 Å<sup>2</sup></p>                                                                      |
| Monomer 2 | X                                                                                                                                                                                                                                                                                                                                                                                                          | <p><b>Residues involved:</b><br/>1 2 4* 5 7* 8* 10* 12* 13 14 16* 17 18 19*<br/>21* 25 27 28 29 30 31 33 34 35 37* 38* 39<br/>41* 42 44 45 46* 47 48* 49 51 52 53 56 58<br/>61 62 63 64 65* 66 68 70 82 83 86 91 93*<br/>95* 96 97 98 99 100 101* 102 103 104*<br/>105* 106* 108 109 110 111 112* 114* 116<br/>135 141* 143 145* 147* 148* 150 152</p> <p><b>Interface interaction energy:</b><br/>-257 kcal/mol</p> <p><b>Interface interaction energy, no van der<br/>Waals repulsion:</b><br/>-269 kcal/mol</p> <p><b>Interface area:</b> 3616 Å<sup>2</sup></p> |
